# Supplementary material for: Valorization of cigarette butts for top value-added chemicals: Levulinic Acid
Source: Research Square preprint supplement (doi:10.21203/rs.3.rs-296494/v1), 2021-03-11
Supplement: Supplementary file 1 [file 3a56ac61124c24e234fc86a1.doc]

Supplemental Information

for

**Valorization of cigarette butts for top value-added chemicals:**

**Levulinic Acid**

Amelita G. Laurenza,1 Onofrio Losito,2 Michele Casiello,2 Caterina Fusco,3 Angelo Nacci,2,3 Vincenzo Pantone1 and Lucia D’Accolti2,3*

1 Ambra SRL Via Mitilini 11 Pomarico, Matera, 75016, Italy

2 Dipartimento di Chimica, Università degli Studi di Bari “A. Moro”, Via Orabona 4, 70126 Bari, Italy.

3 CNR – Istituto di Chimica dei Composti Organometallici (ICCOM), Bari section, via Orabona 4, 70126 Bari, Italy

*E-mail:* lucia.daccolti@uniba.it

**(Xpages, including this cover)**

###### Table of Contents

1. Calibration curve *p. S 2*
2. FTIR-ATR spectrum of Humins *p. S 3*
3. GC/MS analysis of Reaction *p. S 4-5*

Calibration curve is obtained by preparing different solution of Levulinic acid at different concentration, weighting different amounts of Levulinic acid by using an analytical balance. Thus, on the x axis is reported the concentration of standard solution ( % W/W) while on the y axis is reported the peak area of the GC-spectra associated to Levulinic acid signal for each concentration. Knowing the peak area associated to Levulinic acid obtained by the experiments is possible to date back the concentration ( %W/W) by using the equation associated to the calibration curve.


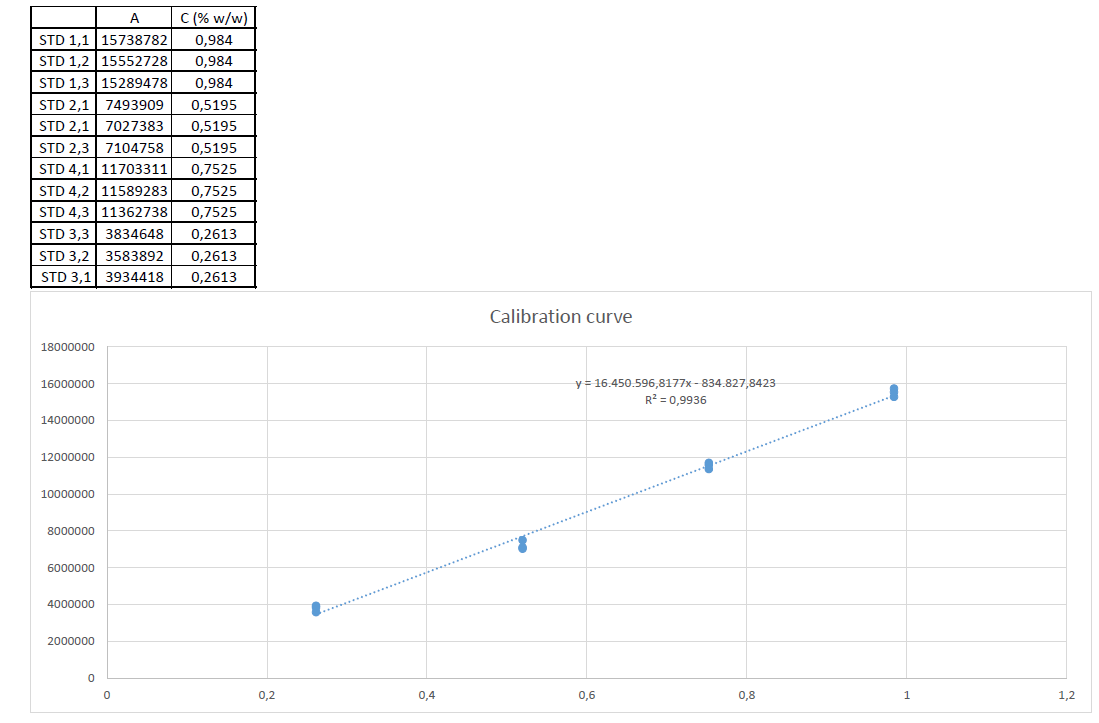


*Figure S1.* Calibration curve for conversion on Levulinic Acid


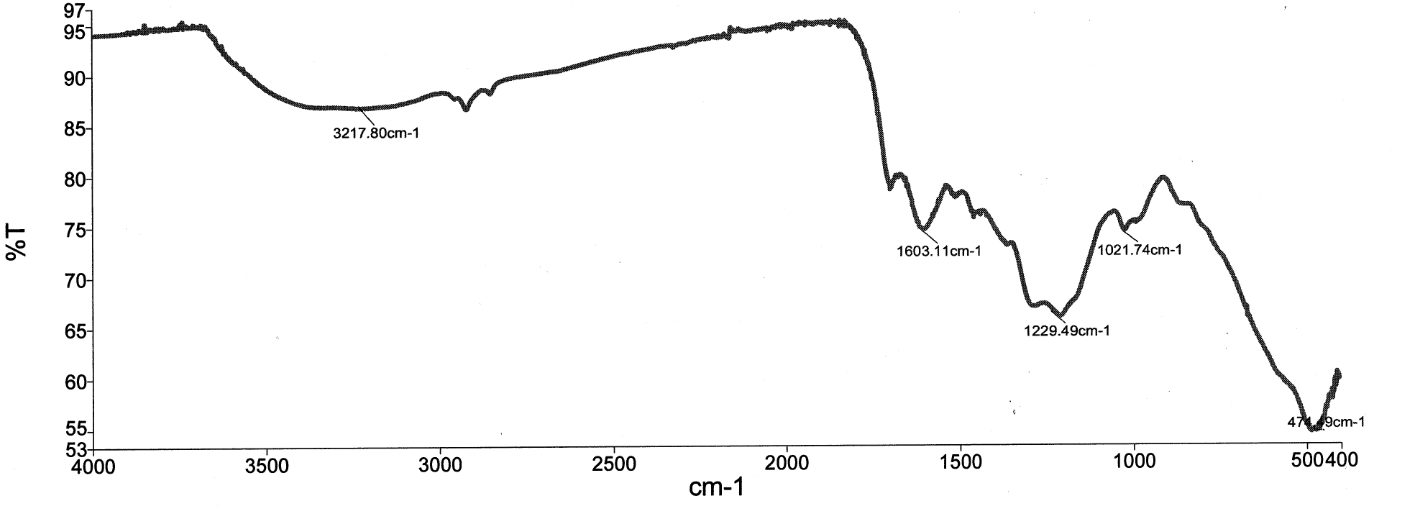


*Figure S2*. FTIR-ATR of Humin from Smoked filter

*Figure S3.* GC/MS analysis of reaction CB unsmoked with CH3COOH (entry 15 Table 1 of paper) Programm 50°Cx1min rate 25°C/min, to 250x20 min.

*Figure S4.* MS spectrum of oreaction CB unsmoked with CH3COOH (entry 15 Table 1 of paper) cf. NIST data base.
